# Supplementary material
Source: PubMed Central journal article supplement (PMC4911196)
Supplement: NIHMS658287-supplement-Supplement.pdf [file NIHMS658287-supplement-Supplement.pdf]

**brainR: Interactive 3 and 4D Images of High Resolution Neuroimage Data**  
**By John Muschelli, Elizabeth Sweeney, and Ciprian Crainiceanu**  
The R Journal Vol. XX/YY, AAAA ISSN 2073-4859

## **Supplemental material**

### **Enabling WebGL in Safari**

By default, WebGL is not enabled in Safari. This is a description of how to enable WebGL in Safari in order to view the webpages created in this paper.

In Safari, open the Safari menu and select Preferences. Then, click the Advanced tab in the Preferences window. Then, at the bottom of the window, check the Show Develop menu in menu bar checkbox. Then, open the Develop menu in the menu bar and select Enable WebGL.
